# Supplementary material for: Electroencephalogram Criticality in Cognitive Impairment: A Monitoring Biomarker?
Source: Preprints.org preprint supplement (doi:10.20944/preprints202403.1643.v1), 2024-03-27
Supplement: Supplementary file 1 [file supplementary]

**#Method of critical fluctuations**

function F = Frequency(A)

F = zeros(1,numel(A));

Dt = 0;

for ii = 1:numel(A)

if A(ii) == 1

Dt = Dt + 1;

else

if Dt ~= 0

F(Dt) = F(Dt) + 1;

Dt = 0;

else

continue;

end

end

end

if A(end) == 1

F(Dt) = F(Dt) + 1;

end

end

**#Haar wavelet analysis**

function wavelets_corr(f_ratioLambda, f_correl, numDataToRead)

Nmax = floor(numDataToRead);%floor is used in case a double is given

if ( Nmax < 0 )

disp('numDataToRead must be a positive integer');

end

% open files to write

f_ratioL = fopen(f_ratioLambda, 'w');

%disp(f_ratioL)

%disp(f_ratioLambda)

if ( f_ratioL < 3 )

disp('Error opening ratioLambda file for write');

return;

end

%read data from file

[y, err_occ] = read_correl_file(f_correl, Nmax);

if ( err_occ )

fclose(f_ratioL);

return;

end

% calculations

j = 0;

k = 0;

sumcritical = 0;

lcount = 0;

for N = (Nmax - 9): Nmax % initial fortran code : do N=771,Nmax

u1=floor(k*N/(2^j)+N/(2^(j+1)));

u2=floor(k*N/(2^j));

u3=floor((k+1)*N/(2^j));

q1=floor(k*N/(2^(j+1))+N/(2^(j+2)));

q2=floor(k*N/(2^(j+1)));

q3=floor((k+1)*N/(2^(j+1)));

r1=floor(k*N/(2^(j+2))+N/(2^(j+3)));

r2=floor(k*N/(2^(j+2)));

r3=floor((k+1)*N/(2^(j+2)));

%fprintf('%3d %3d %3d %3d %3d %3d %3d %3d %3d %3d\n',N,u1,u2,u3,q1,q2,q3,r1,r2,r3);

sum1=0;

for i = u2:u1 % initial fortran code : do i=u2,u1,1

sum1 = sum1 + get_data_from_pos(y, i);

end

sum2=0;

for i = u1:u3 % initial fortran code : do i=u1,u3,1

sum2 = sum2 + get_data_from_pos(y, i);

end

sum3=0;

for i = q2:q1 % initial fortran code : do i=q2,q1,1

sum3 = sum3 + get_data_from_pos(y, i);

end

sum4=0;

for i = q1:q3 % initial fortran code : do i=q1,q3,1

sum4=sum4 + get_data_from_pos(y, i);

end

sum5=0;

for i = r2:r1 % initial fortean code : do i=r2,r1,1

sum5 = sum5 + get_data_from_pos(y, i);

end

sum6=0;

for i = r1:r3 % initial fortran code : do i=r1,r3,1

sum6 = sum6 + get_data_from_pos(y, i);

end

%fprintf('%3d %3d %3d %3d %3d %3d %3d %3d %3d %3d %5.0f %5.0f %5.0f %5.0f %5.0f %5.0f\n',N,u1,u2,u3,q1,q2,q3,r1,r2,r3,sum1,sum2,sum3,sum4,sum5,sum6);

% write data to files

R1=((sum1-sum2)/(sum3-sum4))/(2^0.5);

R2=((sum3-sum4)/(sum5-sum6))/(2^0.5);

fprintf(f_ratioL,'%d %20.9f %20.9f %20.9f\n', N, R1, R2, R1/R2); % initial code : write(2,14)N,R1

sumcritical = sumcritical+ (1-(R1/R2))^2;

lcount=lcount+1;

end

fprintf('Q: %f\n', sumcritical/lcount); % initial code : print*,sumcritical/lcount

%fprintf('%d\n', lcount); %initial code : print*,lcount

fclose(f_ratioL);

end

function val = get_data_from_pos(y, pos)

if ( pos > 0 )

val = y(pos);

else

val = 0;

end

end

function [y, err_occ] = read_correl_file(f_correl, Nmax)

y = dlmread(f_correl);

if ( length(y) < Nmax )

disp('Less values are read from correl file');

err_occ = 1;

return;

end

%for i = 1:Nmax

%fprintf('Data %d %f\n',i,y(i));

%end

err_occ = 0;

end
